# Supplementary material for: Characterization of the upstream and intron promoters of the gene encoding TAR DNA-binding protein
Source: PubMed Central journal article supplement (PMC8062691; doi:10.1038/s41598-021-88015-y), 2021-04-22
Supplement: 41598_2021_88015_MOESM1_ESM.pdf [file 41598_2021_88015_MOESM1_ESM.pdf]

## **Supplemental information**

### **Characterization of the upstream and intron promoters of the gene encoding TAR DNA-binding protein.**

Minami Hasegawa-Ogawa<sup>1</sup>, Hiroataka James Okano<sup>1\*</sup>

1. Division of Regenerative Medicine, The Jikei University School of Medicine, 3-25-8 Nishi-Shimbashi, Minato-ku, Tokyo 1058461, Japan

**Figure S1**

```
+1  GGTGGCGGG GGGAGGAGG GGCCTAGCG CCATTTTGTG GGAGCGAAGC GGTGGCTGGG CTGCCTTGG GTCCGTCGCT
      ↑
      TSS2
      Exon1
+81  GCTTCGGTGT CCTGTGCGG CTCCAGCA GCGGCCTAGC GGTGAGTCG CCGAGCCTTC TCACTGAGGA CGCCGTAGGT
      1 Fwd

+161 GCTCGGCTT CTGCATTGG GGGCCCGAG GCAGACGAG CCGCTTGGG CCTGCCCGG GGAAGTCAGC CGTGAGACCG

+241 GGCCTAGTCC TGCCCGAGCG GGTCCGCGG GGAGCGTGT TAGTCTGG CACGGGAGG CCGGTGCGGC CGAAACGGGG

+321 GGCCTGGCCC GCGGTGCCG GTAGCCTGAG GCGGAGTTG GCGCCGACC CCGACAGTGC CCGAGCCTTC GGTACTTTGT

+401 ACTTCGAGGG ACGCTGCCAG CTTGGGCTG GTGCTCCTGC GCGCCACCCG GGGCCGCGC GAGAACTCC TCCCTCGCT

+481 GGCACGCGCG GCTTCTGGG AGCGACGCG CCGCACCBC AGGACCTGTC GCGCGGGCC TTGGGCTCG GGTCCGAGA

+561 GCGCCGGAA GCGCCAAAAT GAGGACAGA GGGAACTTT TCTCCTGTC TTTACACTG GTTCACTGCC CATATCAGT
      500 Rev      501 Fwd

+641 CTTAGGTTG AGCTGATGA TCGCTTGCT AGGAAAATCG ACTGGGACCT ATCACGCCA TGCCTCAGCC AGTTAGGCTC

+721 CTCCTCTGCC TTGAGGATTA CTTAACGACT AACCCGATTG TCATAAAATA GCTACTGTTT ATTGTTCCCT TGCATACCTT
      603 Fwd      666 Fwd

+801 AGCTTGTAC CAGCAAGCCA CGTTGGACTC ACAGTTACAG TTTGAGTACC TGACGCATCA TAAGCCTTCA GGGAAAGTTT
      737 Fwd

+881 TTTGAATGAA TGAAGTGGG AGGCATCACA TTTTGATAGG AAATCACTAC CCTTACCTC ACCTGTCAT TTTTCAGGGA

+961 TAACCAATGC ATATACGAAT CCAGACAAGC ATTTTCTGG AAGTCAGAAC TGTGACATGG TTTGGGTATT ATCATTATAA
      850 Fwd

+1041 GAAACAGTT ATTCTGACAT GAATGTTGTT CATTCAATC ICTTTTCTCT TTAG +1094
      972 Rev
```

**Figure S1. *TARDBP* exon 1 and intron 1 sequences and primers.** *TARDBP* noncoding exon 1 (+1 to +122), and all 972 nucleotides of *TARDBP* intron 1, (+123 to +1094), with respect to TSS2. The highlighted sequences indicate exon 1. Underlining denotes primer sequences. Fwd; forward primer, Rev; reverse primer.

**Figure S2**

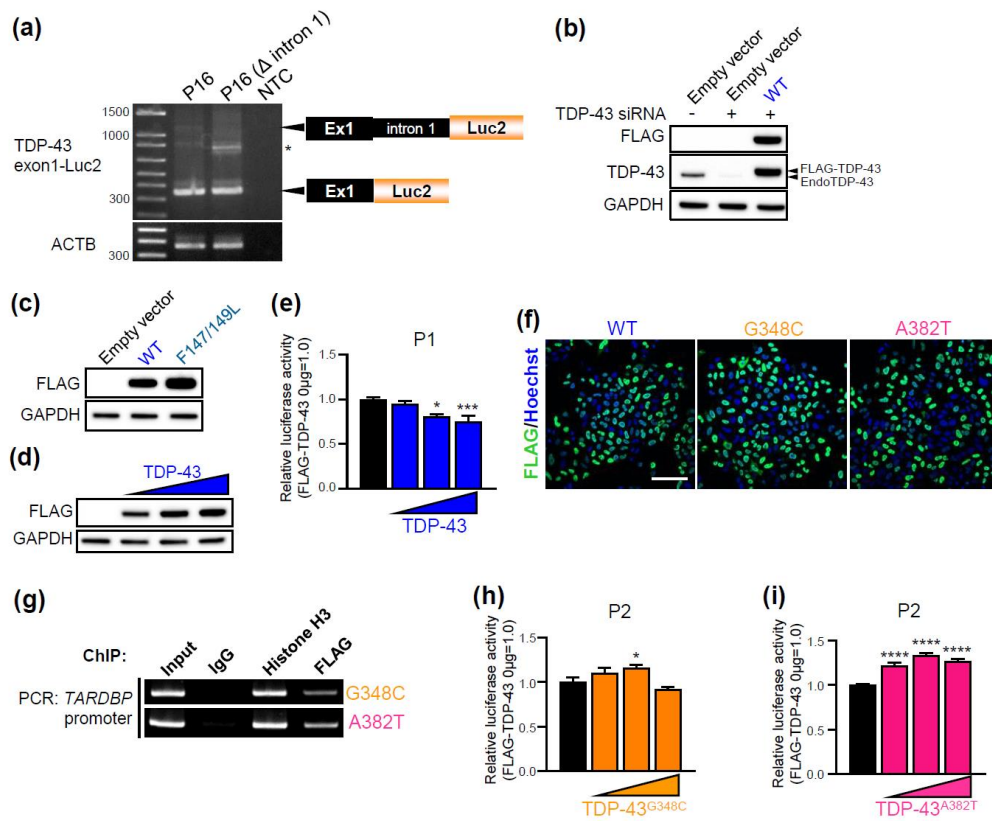

**Figure S2. TDP-43 affects the activity of the *TARDBP* upstream and intron 1 promoters.** (a) RT-PCR analysis of *TARDBP* exon1 to Luc2 and actin-beta mRNA expression in HeLaS3 cells overexpressing P16 or P16 ( $\Delta$ intron 1). Forward and reverse primers are set at *TARDBP* exon1 and Luc2 to detect intron 1 splicing. Amplicon length are following; non-spliced product (exon1-intron 1-Luc2); 1294bp and spliced product (exon1-Luc2); 322bp, respectively. Asterisk indicates non-specific band. (b-d) Immunoblot analysis of endogenous TDP-43 KD and exogenous FLAG-WT TDP-43 overexpression (b), FLAG-WT TDP-43 or mutant TDP-43 (F147/149L) overexpression (c) and FLAG-WT TDP-43 dose-dependent overexpression (d) in HeLaS3 cells. Mock siRNA and/or Empty vector was transfected as the negative control. (e) Luciferase assay of P1 (upstream promoter) in HeLaS3 cells overexpressing dose-dependent FLAG-WT TDP-43. n=9 replicates; one-way ANOVA with *post hoc* Dunnett's test relative to 0 $\mu$ g of TDP-43/pFLAG-CMV2. (f) Immunocytochemistry images of FLAG-TDP-43 (WT, G348C or A382T) overexpressing HeLaS3 cells after 24hr from transfection. Nuclei were stained with Hoechst (blue). Scale bar: 100  $\mu$ m. (g) ChIP assay of overexpressed 2 pathological mutant TDP-43 (G348C or A382T) binding to the *TARDBP* promoter in HEK293T cells. Immunoprecipitation was performed using anti-DDDDK (FLAG) antibody, then PCR was conducted using primer detecting

*TARDBP* -721 to -431 (290bp). Control IgG and Histone H3 antibody are used for negative or positive control for immunoprecipitation. **(h, i)** Luciferase assay of P2 (intron 1 promoter) in HeLaS3 cells overexpressing dose-dependent FLAG-TDP-43 (G348C) **(h)** and FLAG-TDP-43 (A382T) **(i)**. n=6 replicates; one-way ANOVA with *post hoc* Dunnett's test relative to 0 $\mu$ g of TDP-43/pFLAG-CMV2. All samples transfected 2  $\mu$ g of reporter vector and 2  $\mu$ g of pFLAG-CMV2 vector (empty vector + TDP-43). All error bars indicate the means  $\pm$  SEMs. \* $P$ <0.05, \*\*\* $P$ <0.001, \*\*\*\*  $P$ <0.0001.

**Figure S3**

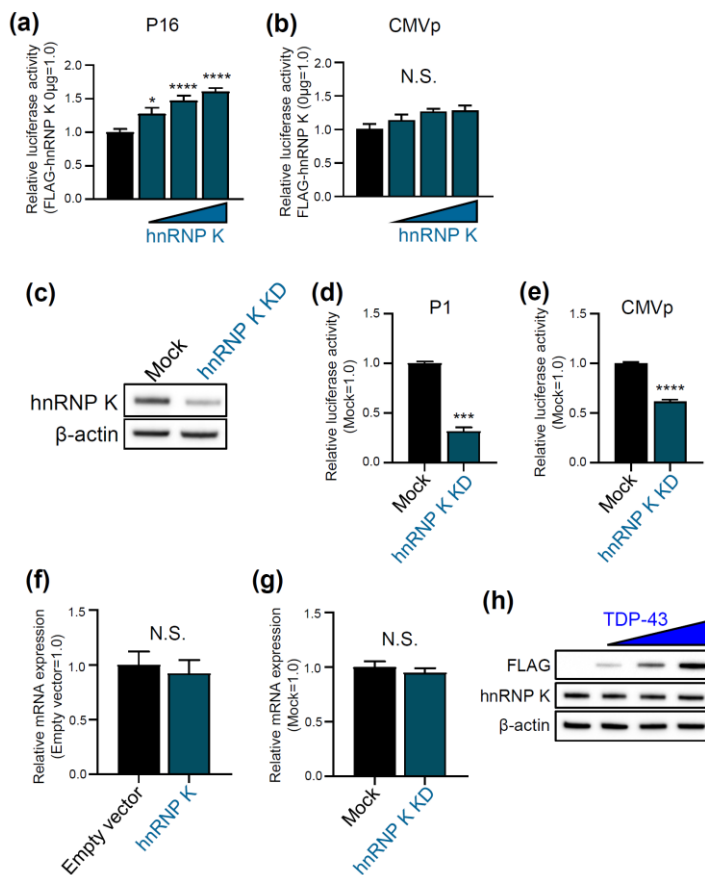

**Figure S3. hnRNP K does not affect intron 1 or CMV promoter activity.** (a, b) Dose-dependent effects of hnRNP K on P16 (a) or the CMV promoter (b). n=9 (a), n=3 (b) replicates, one-way ANOVA with *post hoc* Dunnett's test relative to 0µg of hnRNP K/pFLAG-CMV2. All samples transfected 2 µg of reporter vector and 2 µg of pFLAG-CMV2 vector (empty vector + hnRNP K). (c) Immunoblot analysis of hnRNP K in HeLaS3 cells. Mock and KD indicate transfected negative control or hnRNP K siRNA, respectively. (d, e) Luciferase assay of P1 (d) or CMV promoter (e) activity with hnRNP K KD. n=3 (P1) (d), n=4 (CMVp) (e) replicates; Welch's t-test relative to Mock. (f, g) mRNA expression of endogenous TDP-43 with FLAG-hnRNP K overexpression (f) or hnRNP K KD (g). n=3 replicates, Welch's t-test relative to Empty vector (f) or Mock (g). (h) Immunoblot analysis of hnRNP K with dose-dependent overexpression of FLAG-WT TDP-43. All error bars indicate the means ± SEMs. \**P*<0.05, \*\*\**P*<0.001, \*\*\*\**P*<0.0001.

**Figure S4**

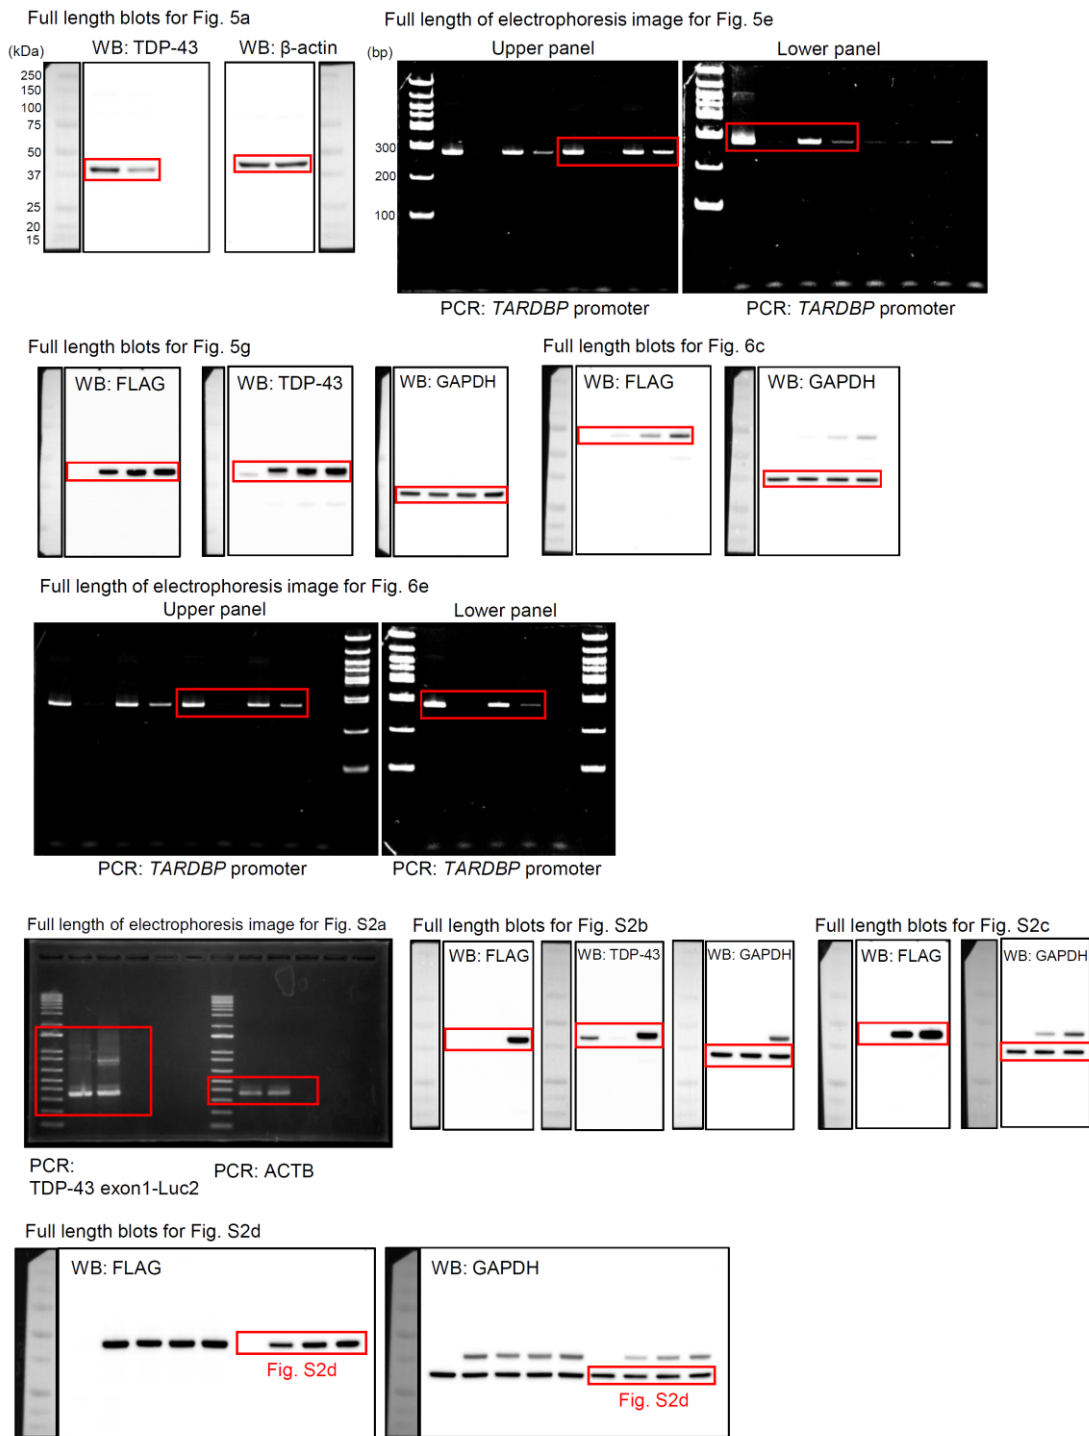

**Figure S4**

Full length of electrophoresis image for Fig. S2g

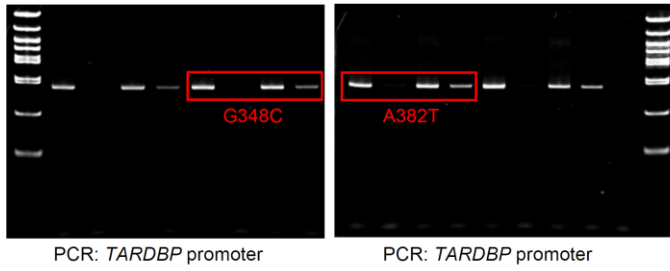

Full length blots for Fig. S3c

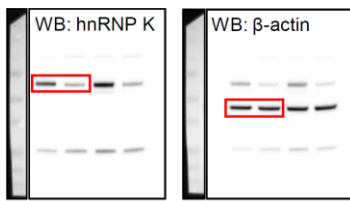

Full length blots for Fig. S3h

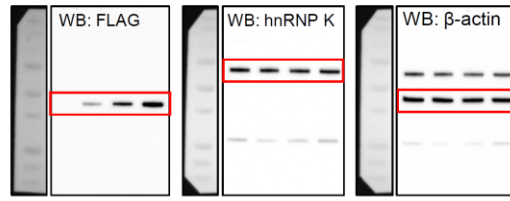

**Figure S4. Full length blots or PCR images used to generate main and supplemental figures.**

**Table S1. siRNA sequences for TDP-43 KD experiments.**

| <b>siRNA</b>                        | <b>siRNA Sequence</b>       |
|-------------------------------------|-----------------------------|
| TDP-43 siRNA<br>passenger           | 5'-GGUUUCUCCUGUAAUAUUUUA-3' |
| TDP-43 siRNA<br>guide               | 5'-AAAUAUUACAGGAGAAACCUU-3' |
| Negative control<br>siRNA passenger | 5'-GUAAACGGCCACAAGUUCAGC-3' |
| Negative control<br>siRNA guide     | 5'-UGAACUUGUGGCCGUUUACGU-3' |



**Table S2. Primers used for construction of TDP-43 tagged with N-terminal FLAG.**

| <b>For production of TDP-43 tagged with N-terminal FLAG</b>                |                                                                                                     |
|----------------------------------------------------------------------------|-----------------------------------------------------------------------------------------------------|
| <b>Gene</b>                                                                | <b>Primer Sequence</b>                                                                              |
| FLAG-TDP-43<br>(WT)                                                        | Forward: 5'-CAAGCTTTCTGAATATATTCGGGTAAC-3'<br>Reverse: 5'-GGGTACCTTACATTCCCCAGCCAGAAGAC-3'          |
| FLAG-TDP-43<br>(F147/149L)                                                 | Forward: 5'-AGGGGCTGGGCCTGGTTCGTTTTACGGAATATG-3'<br>Reverse: 5'-GAACCAGGCCAGCCCCTTTGAATGACCAGTCT-3' |
| FLAG-TDP-43<br>(G348C)                                                     | Same with TDP-43 (WT)                                                                               |
| FLAG-TDP-43<br>(A382T)                                                     | Same with TDP-43 (WT)                                                                               |
| <b>For production of TDP-43 tagged with C-terminal Venus driven by CMV</b> |                                                                                                     |
| TDP-43                                                                     | Forward: 5'- TGGGCCCCCACCATGTCTGAATATATTCGGGTAAC-3'<br>Reverse: 5'-GGGTACCCATTCCCCAGCCAGAAGAC-3'    |
| Venus                                                                      | Forward: 5'-CGGATCCGTGAGCAAGGGCGAGG-3'<br>Reverse: 5'- CGGATCCGTGAGCAAGGGCGAGG -3'                  |
| <b>For production of TDP-43 tagged with C-terminal Venus driven by P1</b>  |                                                                                                     |
| TDP-43                                                                     | Forward: 5'-TTGCGGCCGCCACCATGTCTGAATATATTCGG-3'<br>Reverse: 5'-GGGTACCCATTCCCCAGCCAGAAGAC-3'        |
| Venus                                                                      | Forward: 5'-CGGATCCGTGAGCAAGGGCGAGG-3'<br>Reverse: 5'-CAAGCTTTTACTTGTACAGCTCGTCCATG-3'              |

**Table S3. Primers used for construction of *TARDBP* upstream and intron fragments fused with Luc2.**

| <b>Cloning <i>TARDBP</i> upstream -721/-1</b>                    |                                                                                                                                                                                              |
|------------------------------------------------------------------|----------------------------------------------------------------------------------------------------------------------------------------------------------------------------------------------|
| <b>721/-412</b>                                                  | Forward: 5'-GTCAATTGCGCCTACCGCGTTCAAGCAATTC-3'<br>Reverse: 5'-TAGTGCGTCTTCTCCTCCCT-3'                                                                                                        |
| <b>-431/-281</b>                                                 | Forward: 5'-AGGGAGGAGAAGACGCACTA-3'<br>Reverse: 5'-GAGAGTAGCACAGAGTCTCG-3'                                                                                                                   |
| <b>-300/-1</b>                                                   | Forward: 5'-CGAGACTCTGTGCTACTCTC-3'<br>Reverse: 5'-TTGCGGCCGCGGCGTCCTCTCCCACCGGTTG-3'                                                                                                        |
| <b><i>TARDBP</i> upstream promoter region</b>                    |                                                                                                                                                                                              |
| <b>Name</b>                                                      | <b>Primer Sequence</b>                                                                                                                                                                       |
| <b>P1<br/>(-721/-1)</b>                                          | Forward: 5'-GTCAATTGCGCCTACCGCGTTCAAGCAATTC-3'<br>Reverse: 5'-TTGCGGCCGCGGCGTCCTCTCCCACCGGTTG-3'                                                                                             |
| <b>P4<br/>(-300/-1)</b>                                          | Forward: 5'-GTCAATTGCGAGACTCTGTGCTACTCTC-3'<br>Reverse: 5'-TTGCGGCCGCGGCGTCCTCTCCCACCGGTTG-3'                                                                                                |
| <b>P5<br/>(-721/-223)</b>                                        | Forward: 5'-GTCAATTGCGCCTACCGCGTTCAAGCAATTC-3'<br>Reverse: 5'-TTGCGGCCGCCGCGCCGACCAACCGCCGGCC-3'                                                                                             |
| <b>P6<br/>(-721/-281)</b>                                        | Forward: 5'-GTCAATTGCGCCTACCGCGTTCAAGCAATTC-3'<br>Reverse: 5'-TTGCGGCCGCGAGAGTAGCACAGAGTCTCG-3'                                                                                              |
| <b>P7<br/>(-527/-223)</b>                                        | Forward: 5'-GTCAATTGTGTGAATACTCAGAAAGTACCTGGC-3'<br>Reverse: 5'-TTGCGGCCGCCGCGCCGACCAACCGCCGGCC-3'                                                                                           |
| <b>P8<br/>(-527/-281)</b>                                        | Forward: 5'-GTCAATTGTGTGAATACTCAGAAAGTACCTGGC-3'<br>Reverse: 5'-TTGCGGCCGCGAGAGTAGCACAGAGTCTCG-3'                                                                                            |
| <b>P9<br/>(-527/-327)</b>                                        | Forward: 5'-GTCAATTGTGTGAATACTCAGAAAGTACCTGGC-3'<br>Reverse: 5'-TTGCGGCCGCCCTGGAGGGGGCGGGGCTCGGGATC-3'                                                                                       |
| <b>P17<br/>(<i>del</i> -371/-307)</b>                            | Forward1: 5'-GTCAATTGCGCCTACCGCGTTCAAGCAATTC-3'<br>Reverse1: 5'-GCTCGAGGCAGGATAAGGCCTGGAC-3'<br>Forward2: 5'-CCTCGAGCTGGCCGAGACTCTGTGC-3'<br>Reverse2: 5'-TTGCGGCCGCGGCGTCCTCTCCCACCGGTTG-3' |
| <b><i>TARDBP</i> intron1 (+123/+1094, total 972 nucleotides)</b> |                                                                                                                                                                                              |
| <b>P2<br/>(1/972)</b>                                            | Forward: 5'-GCCAATTGGTGAGTCGCGGAGCCTTC-3'<br>Reverse: 5'-TTGCGGCCGCCTAAAGAGAAAAGAGATATG-3'                                                                                                   |
| <b>P10<br/>(1/500)</b>                                           | Forward: 5'-GCCAATTGGTGAGTCGCGGAGCCTTC-3'<br>Reverse: 5'-TTGCGGCCGCACCAGGTGTAAAGAACAG-3'                                                                                                     |
| <b>P11<br/>(501/972)</b>                                         | Forward: 5'-GTCAATTGTCACTGCCCATATTCAG-3'<br>Reverse: 5'-TTGCGGCCGCCTAAAGAGAAAAGAGATATG-3'                                                                                                    |

|                                                                        |                                                                                                                                                                                                  |
|------------------------------------------------------------------------|--------------------------------------------------------------------------------------------------------------------------------------------------------------------------------------------------|
| <b>P12</b><br><b>(603/972)</b>                                         | Forward: 5'-GCCAATTGTCTGCCTTCAGGATTAC-3'<br>Reverse: 5'-TTGCGGCCGCCTAAAGAGAAAAGAGATATG-3'                                                                                                        |
| <b>P13</b><br><b>(666/972)</b>                                         | Forward: 5'-GCCAATTGCCTTGCATACCCTAGCTTG-3'<br>Reverse: 5'-TTGCGGCCGCCTAAAGAGAAAAGAGATATG-3'                                                                                                      |
| <b>P14</b><br><b>(737/972)</b>                                         | Forward: 5'-GTCAATTGCATAAGCCTTCAGGGAAAG-3'<br>Reverse: 5'-TTGCGGCCGCCTAAAGAGAAAAGAGATATG-3'                                                                                                      |
| <b>P15</b><br><b>(850/972)</b>                                         | Forward: 5'-GTCAATTGTATACGAATCCAGACAAG-3'<br>Reverse: 5'-TTGCGGCCGCCTAAAGAGAAAAGAGATATG-3'                                                                                                       |
| <b><i>TARDBP</i> -721/intron1 (-721/+1094, total 1815 nucleotides)</b> |                                                                                                                                                                                                  |
| <b>P16</b>                                                             | Forward: 5'-GTCAATTGCGCCTACCGCGTTCAAGCAATTC-3'<br>Reverse: 5'-TTGCGGCCGCCTAAAGAGAAAAGAGATATG-3'                                                                                                  |
| <b>P16</b><br><b>(<math>\Delta</math>exon 1)</b>                       | Forward: 5'-GTCAATTGCGCCTACCGCGTTCAAGCAATTC-3'<br>Reverse: 5'-TTGCGGCCGCGGCGTCCTCTCCCACCGGTTG-3'<br>Forward: 5'-TTGCGGCCGCGTGAGTCGCGGAGCCTTC-3'<br>Reverse: 5'-TTGCGGCCGCCTAAAGAGAAAAGAGATATG-3' |
| <b>P16</b><br><b>(<math>\Delta</math>intron 1)</b>                     | Forward: 5'-GTCAATTGCGCCTACCGCGTTCAAGCAATTC-3'<br>Reverse: 5'-TTGCGGCCGCCCGCTAGGCCGCTGCTGG-3'                                                                                                    |
| <b><i>TARDBP</i> intron2 (+1345/+4222, total 2878 nucleotides)</b>     |                                                                                                                                                                                                  |
| <b>P3</b><br><b>(+1345/+4222)</b>                                      | Forward: 5'-GCCAATTGGTTTGTACCATTTGG-3'<br>Reverse: 5'-TTGCGGCCGCCTAAATAAAACGAGCAG-3'                                                                                                             |
| <b>Luciferase reporter</b>                                             |                                                                                                                                                                                                  |
| <b>Luc2</b>                                                            | Forward: 5'-ATTTGCGGCCGCCACCATGGAAGATGCCAAAAAC-3'<br>Reverse: 5'-GGGGTACCTTACACGGCGATCTTGCC-3'                                                                                                   |

**Table S4. Primers used for RT-PCR analysis.**

|                                                |                                                                                 |
|------------------------------------------------|---------------------------------------------------------------------------------|
| <b><i>TARDBP</i> exon 1<br/>to <i>Luc2</i></b> | Forward: 5'-CAAGCTTGGTGGGCGGGGGGAGGAG-3'<br>Reverse: 5'-CTTCATAGCTTCTGCCAGCC-3' |
| <b>Endogenous<br/>TDP-43</b>                   | Forward: 5'-GTTACAGCCCAGTTTCCAG-3'<br>Reverse: 5'-CAGTCATGTCCTCTGTACA-3'        |
| <b>ACTB</b>                                    | Forward: 5'-TCACCATGGATGATGATATC-3'<br>Reverse: 5'-CTGGGTCATCTTCTCGCGG-3'       |

**Table S5. Primers used for ChIP assay.**

|                                       |                                                                                       |
|---------------------------------------|---------------------------------------------------------------------------------------|
| <b><i>TARDBP</i> -721 to<br/>-431</b> | Forward: 5'-GTCAATTGCGCCTACCGCGTTCAAGCAATTC-3'<br>Reverse: 5'-GAGAGTAGCACAGAGTCTCG-3' |
|---------------------------------------|---------------------------------------------------------------------------------------|
